# Supplementary material for: Sugar intake from sweet food and beverages, common mental disorder and depression: prospective findings from the Whitehall II study
Source: Sci Rep. 2017 Jul 27;7:6287. doi: 10.1038/s41598-017-05649-7 (PMC5532289; doi:10.1038/s41598-017-05649-7)
Supplement: Supplementary file 1 — Supplementary Information [file 41598_2017_5649_MOESM1_ESM.pdf]

# **Sugar intake from sweet food and beverages, common mental disorder and depression: prospective findings from the Whitehall II study**

Anika Knüppel<sup>1\*</sup>

Martin J. Shipley<sup>1</sup>

Clare H. Llewellyn<sup>1</sup>

Eric J. Brunner<sup>1</sup>

<sup>1</sup>Affiliations: Department of Epidemiology and Public Health, University College London, London, WC1E 6BT, UK

\*corresponding author: [anika.knuppel.14@ucl.ac.uk](mailto:anika.knuppel.14@ucl.ac.uk)

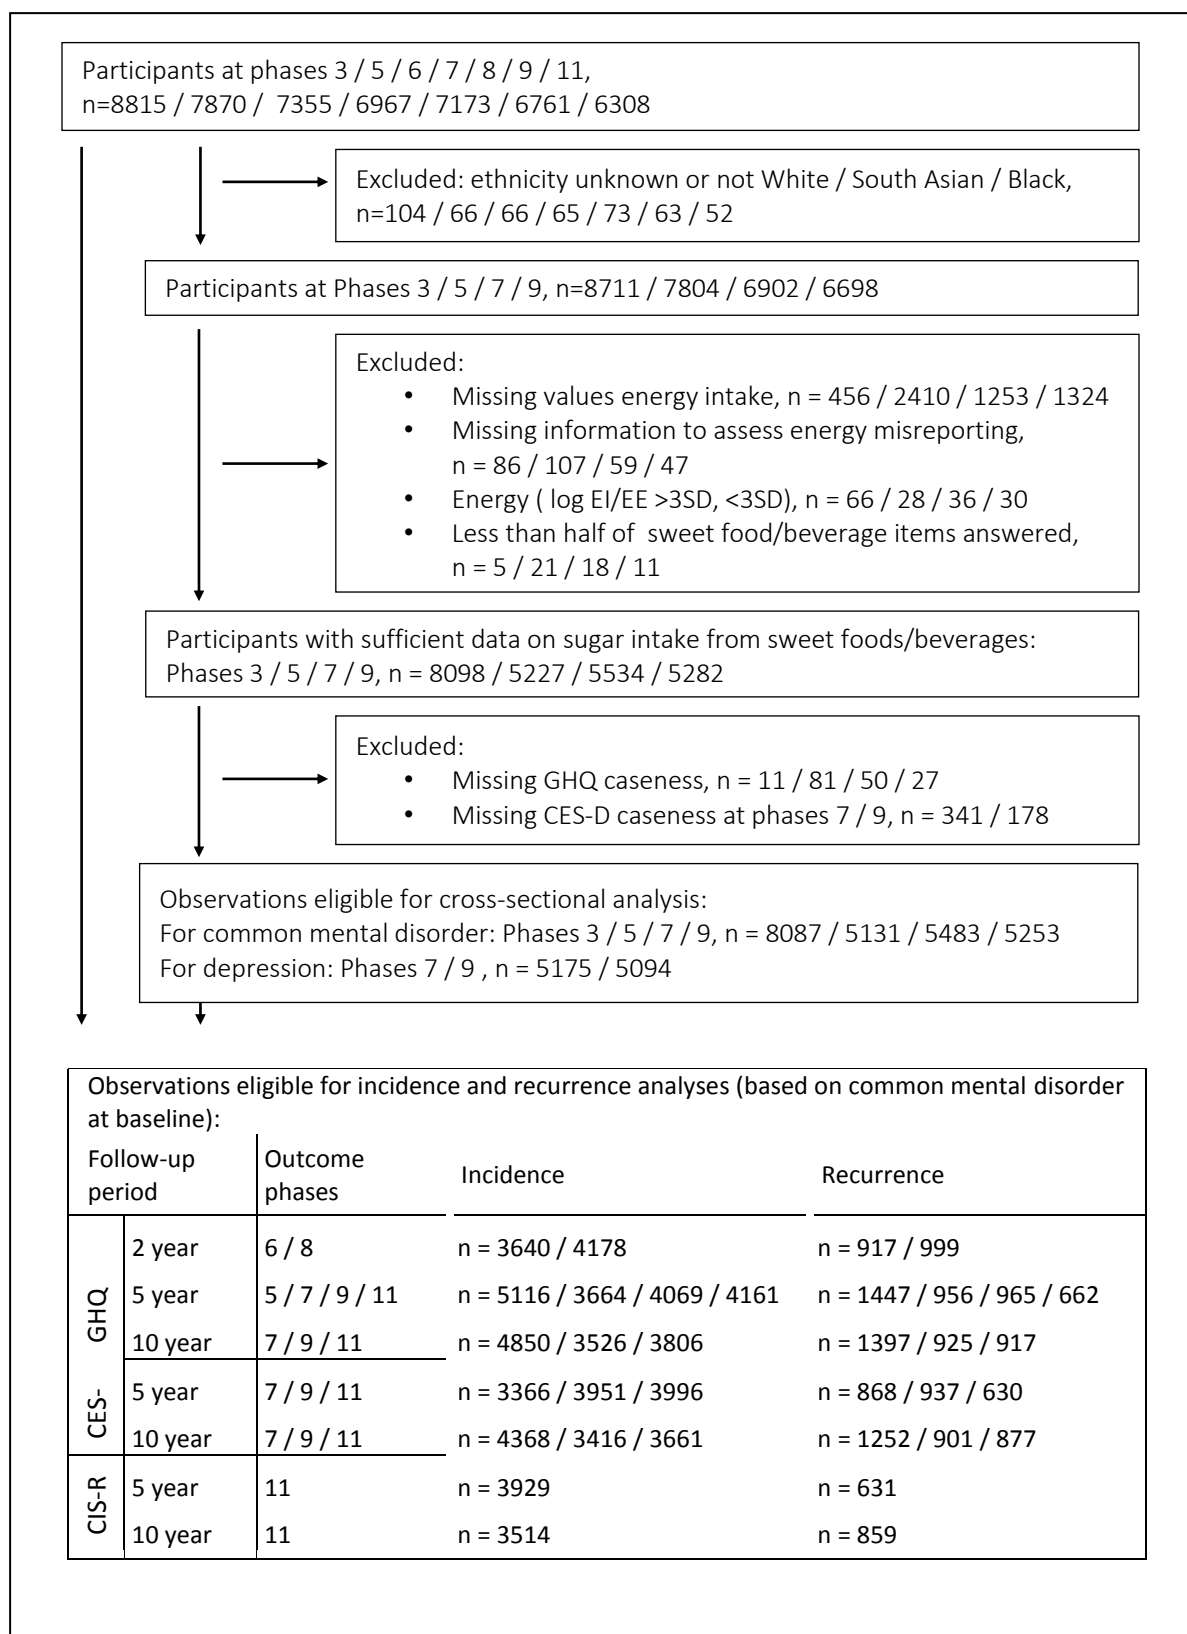

**Figure S1 Inclusion of person observations by phase**

Abbreviations: GHQ = General Health Questionnaire, CES-D = Centre of Epidemiologic Studies Depression Scale, CIS-R = revised Clinical Interview Schedule.

| Sweet food                     | Beverages                            |
|--------------------------------|--------------------------------------|
| sweet biscuits                 | fizzy soft drinks                    |
| buns or pastries               | fruit squash or cordial              |
| Cakes                          | fruit juice                          |
| chocolates or chocolate bars   | malted milk drinks, such as Horlicks |
| fruit pies, tarts or crumbles  | cocoa or hot chocolate               |
| ice cream                      |                                      |
| jam, marmalade or honey        |                                      |
| milk puddings, sponge puddings |                                      |
| added sugar                    |                                      |
| sweets, toffees or mints       |                                      |
|                                |                                      |

**Table S1 Sources of sugar intake from sweet food/ beverages**

|                                        | Incident common mental disorder <sup>b</sup> after 2 years, OR (95% CI) |                      |                      |                      |
|----------------------------------------|-------------------------------------------------------------------------|----------------------|----------------------|----------------------|
|                                        | events / person observations                                            | Model 0 <sup>c</sup> | Model 1 <sup>d</sup> | Model 2 <sup>e</sup> |
| Sugar intake from sweet food/beverages |                                                                         |                      |                      |                      |
| Lowest Tertile                         | 214 / 2059                                                              | 1.0 (reference)      | 1.0 (reference)      | 1.0 (reference)      |
| MiddleTertile                          | 194 / 1799                                                              | 1.05 (0.82 ,1.34)    | 1.05 (0.82 ,1.34)    | 1.00 (0.78 ,1.29)    |
| Highest Tertile                        | 196 / 1581                                                              | 1.33 (1.03 ,1.71)    | 1.31 (1.01 ,1.70)    | 1.19 (0.90 ,1.56)    |
| Total                                  | 604 / 5439                                                              |                      |                      |                      |
| <i>P</i> for trend                     |                                                                         | 0.032                | 0.045                | 0.234                |
|                                        |                                                                         |                      |                      |                      |
|                                        | Incident common mental disorder <sup>b</sup> after 5 years, OR (95% CI) |                      |                      |                      |
|                                        | events / person observations                                            | Model 0 <sup>f</sup> | Model 1 <sup>d</sup> | Model 2 <sup>e</sup> |
| Sugar intake from sweet food/beverages |                                                                         |                      |                      |                      |
| Lowest Tertile                         | 463 / 4391                                                              | 1.0 (reference)      | 1.0 (reference)      | 1.0 (reference)      |
| MiddleTertile                          | 434 / 3886                                                              | 1.06 (0.90 ,1.24)    | 1.08 (0.92 ,1.27)    | 1.05 (0.89 ,1.24)    |
| Highest Tertile                        | 456 / 3467                                                              | 1.30 (1.10 ,1.54)    | 1.32 (1.11 ,1.56)    | 1.24 (1.04 ,1.48)    |
| Total                                  | 1353 / 11744                                                            |                      |                      |                      |
| <i>P</i> for trend                     |                                                                         | 0.002                | 0.002                | 0.019                |
|                                        |                                                                         |                      |                      |                      |

**Table S2 Prospective association of sugar intake from sweet food/beverages and incident common mental disorder after 2 and 5 years in men excluding participants with self-reported doctor diagnosed depression at each baseline<sup>a</sup>**

Abbreviations: OR = Odds ratio, CI = Confidence interval, DASH = Dietary Approaches to Stop Hypertension.

<sup>a</sup>Prospective association across phases 3, 5 for 2-year and 3, 5, 7, 9 for 5-year incident common mental disorder.

<sup>b</sup>Common mental disorder measured using the 30-item General Health Questionnaire.

<sup>c</sup>2-year model 0 (631 events / 5661 person observations): adjusted for age, ethnicity.

<sup>d</sup>Model 1: additionally adjusted for marital status, last grade level in civil service, smoking, alcohol intake, physical activity, sleep duration.

<sup>e</sup>Model 2: additionally adjusted for energy intake from other foods, modified DASH diet score, fish, coffee and tea intake.

<sup>f</sup>5-year model 0 (1413 events / 12238 person observations): adjusted for age, ethnicity.

|                                        | Recurrent clinical depression after 5 years <sup>b</sup> , OR (95% CI) |                      |                      |                      |
|----------------------------------------|------------------------------------------------------------------------|----------------------|----------------------|----------------------|
|                                        |                                                                        | Model 0 <sup>c</sup> | Model 1 <sup>d</sup> | Model 2 <sup>e</sup> |
| Sugar intake from sweet food/beverages |                                                                        |                      |                      |                      |
| Lowest Tertile                         | 27 / 236                                                               | 1.0 (reference)      | 1.0 (reference)      | 1.0 (reference)      |
| MiddleTertile                          | 26 / 182                                                               | 1.37 (0.79, 2.40)    | 1.23 (0.68, 2.24)    | 1.11 (0.60, 2.05)    |
| Highest Tertile                        | 29 / 172                                                               | 1.65 (0.96, 2.87)    | 1.58 (0.87, 2.86)    | 1.24 (0.67, 2.31)    |
| Total                                  | 82 / 590                                                               |                      |                      |                      |
| <i>P</i> for trend                     |                                                                        | 0.07                 | 0.13                 | 0.50                 |
|                                        |                                                                        |                      |                      |                      |

**Table S3 Prospective association of sugar intake from sweet food/beverages and recurrent clinical depression after 5 years<sup>a</sup>**

Abbreviations: OR = Odds ratio, CI = Confidence interval, DASH = Dietary Approaches to Stop Hypertension.

<sup>a</sup>Prospective association across phase 9 to 11.

<sup>b</sup>Clinical depression measured using the revised Clinical Interview Schedule.

<sup>c</sup>Clinical depression model 0 (92 events / 631 participants): adjusted for age\*sex, ethnicity.

<sup>d</sup>Model 1: additionally adjusted for marital status, last grade level in civil service, smoking, alcohol intake, physical activity, sleep duration.

<sup>e</sup>Model 2: additionally adjusted for energy intake from other foods, modified DASH diet score, fish, coffee and tea intake.
